# Supplementary material for: Cross-Species Transmission of Rabbit Hepatitis E Virus to Pigs and Evaluation of the Protection of a Virus-like Particle Vaccine against Rabbit Hepatitis E Virus Infection in Pigs
Source: MDPI journal article supplement (doi:10.3390/vaccines10071053), 2022-06-30
Supplement: s1 [file s1]

# Supplementary Materials:

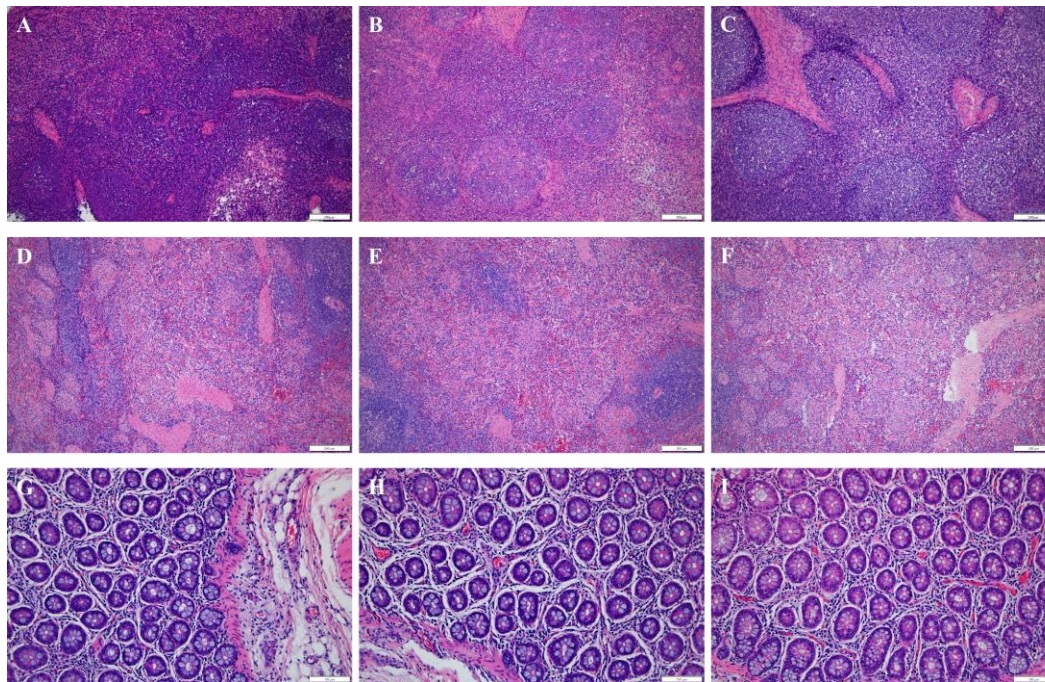

**Figure S1.** Histopathological lesions in abdominal organs: (A) to (C) mesenteric lymph node; (D) to (F) spleen; and (G) to (I) large intestine; (A), (D), and (G) show tissues from pigs in the negative control; (B), (E), and (H) show tissues from pigs in the positive control; (C), (F), and (I) show tissues from pigs in the vaccinated group.

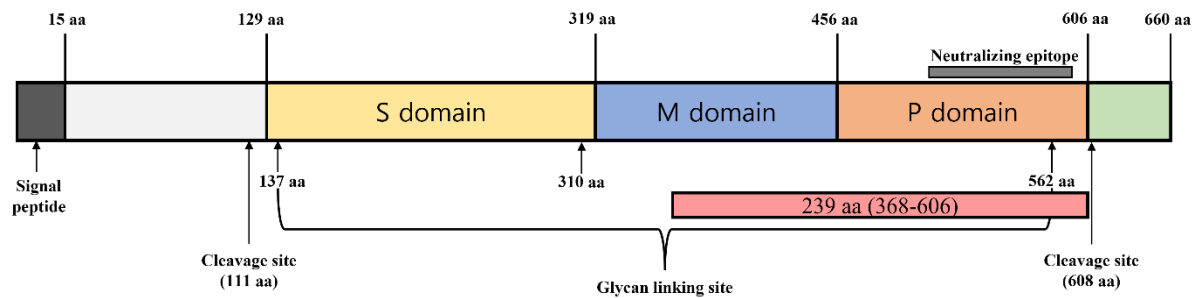

**Figure S2.** Schematic diagram of HEV for VLP vaccine

Table S1. Determination of IL-12 levels in pigs

| week | Negative control |      |      |      | Positive control |      |      |      | Vaccinated |      |      |      |
|------|------------------|------|------|------|------------------|------|------|------|------------|------|------|------|
|      | 1                | 2    | 3    | 4    | 5                | 6    | 7    | 8    | 9          | 10   | 11   | 12   |
| 0    | 0.90             | 0.95 | 1.00 | 1.22 | 0.96             | 1.02 | 0.98 | 0.84 | 0.93       | 1.25 | 1.24 | 1.17 |
| 2    | 0.75             | 0.83 | 0.84 | 0.91 | 1.16             | 0.97 | 0.81 | 1.25 | 0.79       | 0.91 | 0.95 | 0.87 |
| 4    | 0.75             | 0.78 | 1.11 | 0.80 | 1.22             | 1.01 | 1.04 | 3.01 | 2.20       | 2.37 | 2.99 | 3.78 |
| 6    | 0.85             | 1.13 | 0.94 | 0.83 | 0.91             | 1.20 | 0.84 | 1.01 | 1.14       | 0.99 | 1.21 | 1.13 |
| 8    | 0.94             | 1.13 | 0.73 | 0.83 | 0.77             | 0.95 | 1.05 | 1.28 | 1.19       | 0.85 | 0.83 | 1.27 |
| 10   | 1.13             | 1.16 | 0.74 | 1.22 | 0.88             | 0.81 | 1.23 | 0.74 | 1.19       | 1.15 | 0.74 | 1.18 |

Table S2. Determination of IFN- $\gamma$  levels in pigs

| week | Negative control |       |       |       | Positive control |       |       |        | Vaccinated |        |        |        |
|------|------------------|-------|-------|-------|------------------|-------|-------|--------|------------|--------|--------|--------|
|      | 1                | 2     | 3     | 4     | 5                | 6     | 7     | 8      | 9          | 10     | 11     | 12     |
| 0    | 22.74            | 23.98 | 30.47 | 34.43 | 39.06            | 23.44 | 24.64 | 32.90  | 22.73      | 33.94  | 22.35  | 37.92  |
| 2    | 34.56            | 31.66 | 25.38 | 31.10 | 36.00            | 37.92 | 33.31 | 34.74  | 26.05      | 38.69  | 35.12  | 24.28  |
| 4    | 29.09            | 36.24 | 25.03 | 40.45 | 24.49            | 25.78 | 40.71 | 142.59 | 152.08     | 145.83 | 136.83 | 156.72 |
| 6    | 25.78            | 27.25 | 21.85 | 26.61 | 31.95            | 38.82 | 32.38 | 90.77  | 126.68     | 109.84 | 125.86 | 129.90 |
| 8    | 34.65            | 25.75 | 38.01 | 37.87 | 29.14            | 27.37 | 35.71 | 20.59  | 40.13      | 22.37  | 38.47  | 39.84  |
| 10   | 37.82            | 37.22 | 35.68 | 40.62 | 38.58            | 20.67 | 38.62 | 34.51  | 29.99      | 28.27  | 20.45  | 22.17  |
